# Supplementary material for: Epigenetic Reactivation of CDKL5 Rescues CDKL5 Deficiency Disorder
Source: Research Square preprint supplement (doi:10.21203/rs.3.rs-7095603/v1), 2025-08-13
Supplement: Supplementary file 1 [file 0c2e24e6d521180b19e7b78e.xlsx]

## Sheet: Sheet1
Genome	Sample	Number of Input Reads	Average input read length	Uniquely mapped reads number	Uniquely mapped reads %	Average mapped length	Number of splices: Total	Number of splices: Annotated (sjdb)	Number of splices: GT/AG	Number of splices: GC/AG	Number of splices: AT/AC	Number of splices: Non-canonical	Mismatch rate per base, %	Deletion rate per base	Deletion average length	Insertion rate per base	Insertion average length	Number of reads mapped to multiple loci	% of reads mapped to multiple loci	Number of reads mapped to too many loci	% of reads mapped to too many loci	Number of reads unmapped: too many mismatches	% of reads unmapped: too many mismatches	Number of reads unmapped: too short	% of reads unmapped: too short	Number of reads unmapped: other	% of reads unmapped: other	Number of chimeric reads	% of chimeric reads
hg38	JH10_S10_L003	33933676	224	24579800	0.7243	240.89	15719233	0	15528352	113303	9864	67714	0.0041	0.0001	1.6	0.0001	1.59	1419331	0.0418	21998	0.0006	0	0	7883236	0.2323	29311	0.0009	0	0
hg38	JH11_S11_L003	33081726	225	24395533	0.7374	241.21	16332745	0	16146008	115906	10279	60552	0.0039	0.0001	1.61	0.0001	1.59	1410298	0.0426	13980	0.0004	0	0	7248845	0.2191	13070	0.0004	0	0
hg38	JH12_S12_L003	28821041	228	21644628	0.751	241.79	14607339	0	14437452	103325	9274	57288	0.0039	0.0001	1.59	0.0001	1.58	1255197	0.0436	11790	0.0004	0	0	5899916	0.2047	9510	0.0003	0	0
hg38	JH13_S13_L003	36453261	225	26295305	0.7213	240.62	17783754	0	17576616	125055	11164	70919	0.004	0.0001	1.64	0.0001	1.61	1553239	0.0426	26979	0.0007	0	0	8532774	0.2341	44964	0.0012	0	0
hg38	JH14_S14_L003	29874268	222	21199295	0.7096	239.76	15172633	0	14995258	106510	9512	61353	0.004	0.0001	1.59	0.0001	1.6	1263447	0.0423	13439	0.0004	0	0	7384391	0.2472	13696	0.0005	0	0
hg38	JH15_S15_L003	38648754	224	27782455	0.7188	240.29	20106354	0	19851922	141265	13150	100017	0.0039	0.0001	1.58	0.0001	1.58	1682286	0.0435	14983	0.0004	0	0	9155391	0.2369	13639	0.0004	0	0
hg38	JH1_S1_L003	30375708	221	21611008	0.7115	239.4	15511312	0	15330764	109401	10374	60773	0.0038	0.0001	1.6	0.0001	1.64	1299955	0.0428	9784	0.0003	0	0	7447068	0.2452	7893	0.0003	0	0
hg38	JH2_S2_L003	37625504	225	27533258	0.7318	240.64	18849211	0	18629719	130018	12565	76909	0.0042	0.0001	1.55	0.0001	1.65	1845294	0.049	16754	0.0004	0	0	8216814	0.2184	13384	0.0004	0	0
hg38	JH3_S0_L001	30832797	229	23762623	0.7707	242.19	16875130	0	16681515	122031	10957	60627	0.0039	0.0001	1.62	0.0001	1.66	1325123	0.043	8795	0.0003	0	0	5729463	0.1858	6793	0.0002	0	0
hg38	JH4_S4_L003	36914959	227	27327428	0.7403	240.99	20990837	0	20763446	144129	13069	70193	0.0039	0.0001	1.56	0.0001	1.66	1698804	0.046	11927	0.0003	0	0	7869659	0.2132	7141	0.0002	0	0
hg38	JH5_S5_L003	29402590	226	21582691	0.734	240.53	16584088	0	16406966	112133	10164	54825	0.004	0.0001	1.57	0.0001	1.65	1319697	0.0449	10172	0.0003	0	0	6482673	0.2205	7357	0.0003	0	0
hg38	JH6_S6_L003	51480542	232	40038198	0.7777	242.53	30675572	0	30338735	209867	18983	107987	0.004	0.0001	1.57	0.0001	1.65	2341892	0.0455	16091	0.0003	0	0	9075115	0.1763	9246	0.0002	0	0
hg38	JH7_S7_L003	37787065	223	27343347	0.7236	239.97	19968190	0	19751686	137248	12176	67080	0.004	0.0001	1.59	0.0001	1.61	1687763	0.0447	13398	0.0004	0	0	8732792	0.2311	9765	0.0003	0	0
hg38	JH8_S8_L003	37269773	225	27501047	0.7379	240.9	20113306	0	19899190	137138	12550	64428	0.0038	0.0001	1.62	0.0001	1.61	1701333	0.0456	11634	0.0003	0	0	8047668	0.2159	8091	0.0002	0	0
hg38	JH9_S0_L001	30577934	224	22293687	0.7291	240.41	16487968	0	16308889	114119	9885	55075	0.0037	0.0001	1.6	0.0001	1.62	1389599	0.0454	10732	0.0004	0	0	6876296	0.2249	7620	0.0002	0	0
hg38	A0416	21866080	245	1057486	0.0484	210.66	602169	0	596028	1741	11	4389	0.0409	0.0011	1.89	0.0008	1.99	252084	0.0115	3177	0.0001	0	0	20552025	0.9399	1308	0.0001	0	0
hg38	A1036	22434033	245	940079	0.0419	210.49	528158	0	522397	1604	38	4119	0.0412	0.0012	1.89	0.0008	2	221798	0.0099	2686	0.0001	0	0	21268554	0.948	916	0	0	0
hg38	A1332	25673786	245	1118282	0.0436	210.77	631762	0	625191	2007	36	4528	0.041	0.0012	1.91	0.0008	1.99	297483	0.0116	3899	0.0002	0	0	24252967	0.9447	1155	0	0	0
hg38	A1733	26088185	245	1074135	0.0412	210.54	588061	0	581929	1801	17	4314	0.0412	0.0012	1.89	0.0009	1.99	283193	0.0109	3680	0.0001	0	0	24726226	0.9478	951	0	0	0
hg38	A1734	22470482	246	1048078	0.0466	211.37	588736	0	582599	1786	34	4317	0.0413	0.0012	1.92	0.0009	2.01	260696	0.0116	3011	0.0001	0	0	21157866	0.9416	831	0	0	0
hg38	B0417	24600402	245	1100656	0.0447	210.29	611688	0	605182	1768	27	4711	0.0413	0.0011	1.9	0.0009	2.02	309762	0.0126	3884	0.0002	0	0	23185167	0.9425	933	0	0	0
hg38	B1330	29110255	245	1269093	0.0436	210.98	699128	0	691563	2023	29	5513	0.0413	0.0012	1.9	0.0009	2.01	442029	0.0152	5194	0.0002	0	0	27392836	0.941	1103	0	0	0
hg38	B1728	27589894	245	1298030	0.047	211.49	730872	0	723105	2161	21	5585	0.0407	0.0012	1.91	0.0008	1.95	400366	0.0145	5479	0.0002	0	0	25884184	0.9382	1835	0.0001	0	0
hg38	B2629	27159207	245	1096464	0.0404	210.12	586582	0	580254	1623	36	4669	0.0413	0.0012	1.89	0.0009	1.98	407205	0.015	5276	0.0002	0	0	25649265	0.9444	997	0	0	0
hg38	C1331	29769567	245	1285266	0.0432	210.45	723845	0	716150	2179	30	5486	0.0412	0.0011	1.89	0.0008	1.99	402242	0.0135	5006	0.0002	0	0	28075788	0.9431	1265	0	0	0
hg38	C1376	33238516	245	1550078	0.0466	210.46	878682	0	869251	2610	52	6769	0.0412	0.0012	1.92	0.0008	2.01	407898	0.0123	5082	0.0002	0	0	31273985	0.9409	1473	0	0	0
hg38	C1735	28109184	245	1384192	0.0492	210.37	791184	0	782805	2254	25	6100	0.0412	0.0011	1.9	0.0008	2.02	295382	0.0105	3461	0.0001	0	0	26424938	0.9401	1211	0	0	0
mm39	JH10_S10_L003	33933676	224	2274469	0.067	192.02	1039080	0	1023171	3814	279	11816	0.0404	0.0005	2.1	0.0006	2.08	287555	0.0085	4679	0.0001	0	0	31360650	0.9242	6323	0.0002	0	0
mm39	JH11_S11_L003	33081726	225	2382344	0.072	193.03	1081499	0	1064522	4317	389	12271	0.0403	0.0005	2.12	0.0006	2.1	311608	0.0094	3828	0.0001	0	0	30378181	0.9183	5765	0.0002	0	0
mm39	JH12_S12_L003	28821041	228	2104533	0.073	196.3	973233	0	958556	3907	309	10461	0.0399	0.0005	2.09	0.0006	2.13	279894	0.0097	2963	0.0001	0	0	26428687	0.917	4964	0.0002	0	0
mm39	JH13_S13_L003	36453261	225	2424654	0.0665	192.16	1102959	0	1086068	4259	424	12208	0.0397	0.0005	2.08	0.0006	2.12	300623	0.0082	5669	0.0002	0	0	33715457	0.9249	6858	0.0002	0	0
mm39	JH14_S14_L003	29874268	222	2177128	0.0729	189.46	957545	0	942186	3696	377	11286	0.04	0.0005	2.07	0.0006	2.14	277966	0.0093	5232	0.0002	0	0	27408068	0.9174	5874	0.0002	0	0
mm39	JH15_S15_L003	38648754	224	2872407	0.0743	191.72	1245686	0	1225805	4730	478	14673	0.0394	0.0005	2.04	0.0006	2.12	390118	0.0101	6025	0.0002	0	0	35372756	0.9152	7448	0.0002	0	0
mm39	JH1_S1_L003	30375708	221	2448333	0.0806	189.18	1037805	0	1020588	3887	393	12937	0.0404	0.0005	2.06	0.0006	2.1	377456	0.0124	4933	0.0002	0	0	27539463	0.9066	5523	0.0002	0	0
mm39	JH2_S2_L003	37625504	225	2936322	0.078	193.22	1181420	0	1162728	3736	504	14452	0.0392	0.0005	1.99	0.0007	2.17	475554	0.0126	5801	0.0002	0	0	34201105	0.909	6722	0.0002	0	0
mm39	JH3_S0_L001	30832797	229	2354688	0.0764	196.76	1098949	0	1082563	4122	476	11788	0.0403	0.0005	2.06	0.0006	2.09	339650	0.011	3492	0.0001	0	0	28130438	0.9124	4529	0.0001	0	0
mm39	JH4_S4_L003	36914959	227	2822015	0.0764	195.19	1264771	0	1245381	4921	507	13962	0.0389	0.0005	2.04	0.0006	2.15	375021	0.0102	6024	0.0002	0	0	33704905	0.913	6994	0.0002	0	0
mm39	JH5_S5_L003	29402590	226	2236744	0.0761	193.27	981398	0	966291	3816	390	10901	0.0393	0.0005	2.05	0.0006	2.16	305500	0.0104	4837	0.0002	0	0	26850167	0.9132	5342	0.0002	0	0
mm39	JH6_S6_L003	51480542	232	3807223	0.074	199.54	1784468	0	1758902	7085	686	17795	0.0388	0.0005	2.04	0.0006	2.19	483790	0.0094	6502	0.0001	0	0	47174565	0.9164	8462	0.0002	0	0
mm39	JH7_S7_L003	37787065	223	2919291	0.0773	191.22	1269976	0	1249373	5021	478	15104	0.0402	0.0005	2.12	0.0006	2.19	423720	0.0112	5754	0.0002	0	0	34431170	0.9112	7130	0.0002	0	0
mm39	JH8_S8_L003	37269773	225	2938736	0.0789	193.45	1274118	0	1253257	5391	470	15000	0.0398	0.0005	2.09	0.0006	2.17	439777	0.0118	5400	0.0001	0	0	33879288	0.909	6572	0.0002	0	0
mm39	JH9_S0_L001	30577934	224	2408372	0.0788	192.39	1059152	0	1042071	4261	352	12468	0.04	0.0005	2.11	0.0006	2.18	349148	0.0114	4501	0.0001	0	0	27810151	0.9095	5762	0.0002	0	0
mm39	A0416	21866080	245	16502684	0.7547	241.76	8734974	0	8640510	64963	6747	22754	0.0025	0.0001	1.74	0.0001	1.54	959836	0.0439	37057	0.0017	0	0	4355196	0.1992	11307	0.0005	0	0
mm39	A1036	22434033	245	16214689	0.7228	241.81	8297151	0	8206500	62155	5955	22541	0.0026	0.0001	1.75	0.0001	1.52	1134914	0.0506	33314	0.0015	0	0	5039978	0.2247	11138	0.0005	0	0
mm39	A1332	25673786	245	18647593	0.7263	241.5	9584857	0	9482783	72106	6914	23054	0.0025	0.0001	1.73	0.0001	1.56	1102337	0.0429	37954	0.0015	0	0	5872484	0.2287	13418	0.0005	0	0
mm39	A1733	26088185	245	18862048	0.723	242.16	9287251	0	9185161	68413	6593	27084	0.0026	0.0001	1.76	0.0001	1.53	1349502	0.0517	38742	0.0015	0	0	5825116	0.2233	12777	0.0005	0	0
mm39	A1734	22470482	246	17641155	0.7851	243.09	9211675	0	9116542	68327	6846	19960	0.0024	0.0001	1.77	0.0001	1.5	1014133	0.0451	38179	0.0017	0	0	3764957	0.1676	12058	0.0005	0	0
mm39	B0417	24600402	245	18383668	0.7473	242.66	9487313	0	9374026	71115	7036	35136	0.0025	0.0001	1.85	0.0001	1.57	1153496	0.0469	39561	0.0016	0	0	5011835	0.2037	11842	0.0005	0	0
mm39	B1330	29110255	245	22105908	0.7594	243.1	11046559	0	10923743	81097	8119	33600	0.0026	0.0001	1.84	0.0001	1.64	2038640	0.07	47728	0.0016	0	0	4906218	0.1685	11761	0.0004	0	0
mm39	B1728	27589894	245	21654853	0.7849	242.78	10754660	0	10632815	78069	8070	35706	0.0025	0.0001	1.78	0.0001	1.58	1588373	0.0576	46238	0.0017	0	0	4283269	0.1552	17161	0.0006	0	0
mm39	B2629	27159207	245	19919430	0.7334	242.47	9464586	0	9357776	69003	7092	30715	0.0025	0.0001	1.86	0.0001	1.61	1852279	0.0682	41729	0.0015	0	0	5332084	0.1963	13685	0.0005	0	0
mm39	C1331	29769567	245	22404553	0.7526	242.69	11299106	0	11159350	82656	8855	48245	0.0025	0.0001	1.86	0.0001	1.61	1725036	0.0579	45754	0.0015	0	0	5578948	0.1874	15276	0.0005	0	0
mm39	C1376	33238516	245	25250877	0.7597	242.49	13214569	0	13067656	98368	9941	38604	0.0024	0.0001	1.79	0.0001	1.55	1633151	0.0491	50980	0.0015	0	0	6285302	0.1891	18206	0.0005	0	0
mm39	C1735	28109184	245	21555587	0.7669	242.49	11639532	0	11508707	86946	8701	35178	0.0025	0.0001	1.78	0.0001	1.48	1203380	0.0428	47478	0.0017	0	0	5288968	0.1882	13771	0.0005	0	0
pAAV-dCC-TET1CD	JH10_S10_L003	33933676	224	95	0	207.11	39	0	39	0	0	0	0.0065	0.0001	1	0.0001	1	0	0	0	0	0	0	3219918	0.0949	30713663	0.9051	0	0
pAAV-dCC-TET1CD	JH11_S11_L003	0	0	0	0	0	0	0	0	0	0	0	NA	0	0	0	0	0	0	0	0	0	0	0	0	0	0	0	0
pAAV-dCC-TET1CD	JH12_S12_L003	28821041	228	84	0	210.31	42	0	42	0	0	0	0.0069	0	0	0	0	1	0	0	0	0	0	2330851	0.0809	26490105	0.9191	0	0
pAAV-dCC-TET1CD	JH13_S13_L003	36453261	225	177	0	117.21	45	0	45	0	0	0	0.008	0.0002	2	0	0	21	0	0	0	0	0	3386943	0.0929	33066120	0.9071	0	0
pAAV-dCC-TET1CD	JH14_S14_L003	0	0	0	0	0	0	0	0	0	0	0	NA	0	0	0	0	0	0	0	0	0	0	0	0	0	0	0	0
pAAV-dCC-TET1CD	JH15_S15_L003	38648754	224	124	0	118.33	38	0	38	0	0	0	0.0052	0.0001	1	0	0	2	0	0	0	0	0	3805504	0.0985	34843124	0.9015	0	0
pAAV-dCC-TET1CD	JH1_S1_L003	30375708	221	537	0	232.14	51	0	45	0	0	6	0.0042	0	1	0.0001	1	10	0	0	0	0	0	3339705	0.1099	27035456	0.89	0	0
pAAV-dCC-TET1CD	JH2_S2_L003	37625504	225	1249	0	234.27	41	0	35	0	0	6	0.0038	0.0001	1.89	0.0002	1.02	21	0	1	0	0	0	3533074	0.0939	34091159	0.9061	0	0
pAAV-dCC-TET1CD	JH3_S0_L001	30832797	229	433	0	233.87	50	0	47	0	0	3	0.0038	0.0001	2.33	0.0002	1.23	9	0	0	0	0	0	2334985	0.0757	28497370	0.9243	0	0
pAAV-dCC-TET1CD	JH4_S4_L003	36914959	227	133	0	101.36	23	0	22	0	0	1	0.0053	0	0	0	0	4	0	0	0	0	0	3008657	0.0815	33906165	0.9185	0	0
pAAV-dCC-TET1CD	JH5_S5_L003	29402590	226	121	0	101.76	23	0	23	0	0	0	0.0063	0.0002	3	0.0002	3	2	0	0	0	0	0	2607905	0.0887	26794562	0.9113	0	0
pAAV-dCC-TET1CD	JH6_S6_L003	51480542	232	156	0	139.24	30	0	30	0	0	0	0.0051	0	0	0	0	3	0	0	0	0	0	3271025	0.0635	48209358	0.9365	0	0
pAAV-dCC-TET1CD	JH7_S7_L003	0	0	0	0	0	0	0	0	0	0	0	NA	0	0	0	0	0	0	0	0	0	0	0	0	0	0	0	0
pAAV-dCC-TET1CD	JH8_S8_L003	37269773	225	83	0	202.1	38	0	38	0	0	0	0.0061	0	0	0.0001	2	2	0	0	0	0	0	3487942	0.0936	33781746	0.9064	0	0
pAAV-dCC-TET1CD	JH9_S0_L001	30577934	224	70	0	198.64	36	0	36	0	0	0	0.0077	0	0	0	0	0	0	0	0	0	0	2975811	0.0973	27602053	0.9027	0	0
pAAV-dCC-TET1CD	A0416	21866080	245	31	0	242.65	0	0	0	0	0	0	0.0084	0	0	0	0	0	0	0	0	0	0	150156	0.0069	21715893	0.9931	0	0
pAAV-dCC-TET1CD	A1036	22434033	245	12	0	235.25	0	0	0	0	0	0	0.0018	0	0	0.0007	1	0	0	0	0	0	0	124053	0.0055	22309968	0.9945	0	0
pAAV-dCC-TET1CD	A1332	25673786	245	31	0	229.81	0	0	0	0	0	0	0.0038	0	0	0	0	0	0	0	0	0	0	137547	0.0054	25536208	0.9946	0	0
pAAV-dCC-TET1CD	A1733	26088185	245	3	0	249	0	0	0	0	0	0	0	0	0	0	0	0	0	0	0	0	0	138227	0.0053	25949955	0.9947	0	0
pAAV-dCC-TET1CD	A1734	22470482	246	0	0	0	0	0	0	0	0	0	NA	0	0	0	0	0	0	0	0	0	0	97616	0.0043	22372866	0.9957	0	0
pAAV-dCC-TET1CD	B0417	24600402	245	1	0	54	2	0	2	0	0	0	0.0741	0	0	0	0	0	0	0	0	0	0	154984	0.0063	24445417	0.9937	0	0
pAAV-dCC-TET1CD	B1330	29110255	245	2	0	40	4	0	4	0	0	0	0.05	0	0	0	0	0	0	0	0	0	0	141443	0.0049	28968810	0.9951	0	0
pAAV-dCC-TET1CD	B1728	27589894	245	0	0	0	0	0	0	0	0	0	NA	0	0	0	0	0	0	0	0	0	0	153323	0.0056	27436571	0.9944	0	0
pAAV-dCC-TET1CD	B2629	27159207	245	0	0	0	0	0	0	0	0	0	NA	0	0	0	0	0	0	0	0	0	0	171067	0.0063	26988140	0.9937	0	0
pAAV-dCC-TET1CD	C1331	29769567	245	1	0	48	4	0	4	0	0	0	0.125	0	0	0	0	0	0	0	0	0	0	170711	0.0057	29598855	0.9943	0	0
pAAV-dCC-TET1CD	C1376	33238516	245	1	0	42	4	0	4	0	0	0	0.0476	0	0	0	0	0	0	0	0	0	0	220820	0.0066	33017695	0.9934	0	0
pAAV-dCC-TET1CD	C1735	28109184	245	0	0	0	0	0	0	0	0	0	NA	0	0	0	0	0	0	0	0	0	0	206570	0.0073	27902614	0.9927	0	0
pAAV-sgRNA-tRNA-hsCDKL5-CMV-KASH-EGFP	JH10_S10_L003	33933676	224	12	0	51.08	6	0	6	0	0	0	0.0701	0	0	0	0	11	0	0	0	0	0	2127962	0.0627	31805691	0.9373	0	0
pAAV-sgRNA-tRNA-hsCDKL5-CMV-KASH-EGFP	JH11_S11_L003	33081726	225	14	0	61.64	12	0	12	0	0	0	0.0487	0	0	0	0	12	0	0	0	0	0	2012519	0.0608	31069181	0.9392	0	0
pAAV-sgRNA-tRNA-hsCDKL5-CMV-KASH-EGFP	JH12_S12_L003	28821041	228	16	0	46.81	8	0	8	0	0	0	0.0601	0	0	0	0	6	0	0	0	0	0	1521204	0.0528	27299815	0.9472	0	0
pAAV-sgRNA-tRNA-hsCDKL5-CMV-KASH-EGFP	JH13_S13_L003	36453261	225	259294	0.0071	246.2	2175	0	405	157	3	1610	0.0031	0.0001	1.42	0.0003	5.62	4116	0.0001	0	0	0	0	2312078	0.0634	33877773	0.9293	0	0
pAAV-sgRNA-tRNA-hsCDKL5-CMV-KASH-EGFP	JH14_S14_L003	0	0	0	0	0	0	0	0	0	0	0	NA	0	0	0	0	0	0	0	0	0	0	0	0	0	0	0	0
pAAV-sgRNA-tRNA-hsCDKL5-CMV-KASH-EGFP	JH15_S15_L003	38648754	224	329818	0.0085	246.27	3619	0	655	94	6	2864	0.0029	0.0001	1.92	0	1.92	4412	0.0001	0	0	0	0	2646347	0.0685	35668177	0.9229	0	0
pAAV-sgRNA-tRNA-hsCDKL5-CMV-KASH-EGFP	JH1_S1_L003	0	0	0	0	0	0	0	0	0	0	0	NA	0	0	0	0	0	0	0	0	0	0	0	0	0	0	0	0
pAAV-sgRNA-tRNA-hsCDKL5-CMV-KASH-EGFP	JH2_S2_L003	37625504	225	73203	0.0019	246.37	535	0	146	24	1	364	0.0033	0.0001	1.53	0.0002	5.62	1048	0	0	0	0	0	2402033	0.0638	35149220	0.9342	0	0
pAAV-sgRNA-tRNA-hsCDKL5-CMV-KASH-EGFP	JH3_S0_L001	30832797	229	36003	0.0012	246.79	227	0	62	10	0	155	0.003	0.0001	1.72	0.0001	3.17	489	0	0	0	0	0	1549525	0.0503	29246780	0.9486	0	0
pAAV-sgRNA-tRNA-hsCDKL5-CMV-KASH-EGFP	JH4_S4_L003	36914959	227	501168	0.0136	246.43	3773	0	725	99	6	2943	0.003	0.0001	1.82	0	1.96	7056	0.0002	0	0	0	0	2103801	0.057	34302934	0.9292	0	0
pAAV-sgRNA-tRNA-hsCDKL5-CMV-KASH-EGFP	JH5_S5_L003	29402590	226	316431	0.0108	246.53	2400	0	476	124	3	1797	0.003	0.0001	1.84	0	1.97	4299	0.0001	1	0	0	0	1810302	0.0616	27271557	0.9275	0	0
pAAV-sgRNA-tRNA-hsCDKL5-CMV-KASH-EGFP	JH6_S6_L003	51480542	232	531744	0.0103	246.71	3965	0	796	108	10	3051	0.0031	0.0001	1.86	0	1.98	7641	0.0001	0	0	0	0	2240675	0.0435	48700482	0.946	0	0
pAAV-sgRNA-tRNA-hsCDKL5-CMV-KASH-EGFP	JH7_S7_L003	0	0	0	0	0	0	0	0	0	0	0	NA	0	0	0	0	0	0	0	0	0	0	0	0	0	0	0	0
pAAV-sgRNA-tRNA-hsCDKL5-CMV-KASH-EGFP	JH8_S8_L003	0	0	0	0	0	0	0	0	0	0	0	NA	0	0	0	0	0	0	0	0	0	0	0	0	0	0	0	0
pAAV-sgRNA-tRNA-hsCDKL5-CMV-KASH-EGFP	JH9_S0_L001	30577934	224	16	0	50.12	13	0	12	0	0	1	0.0648	0	0	0	0	14	0	0	0	0	0	1995988	0.0653	28581916	0.9347	0	0
pAAV-sgRNA-tRNA-hsCDKL5-CMV-KASH-EGFP	A0416	21866080	245	133	0	230.86	4	0	4	0	0	0	0.0021	0.0006	3	0	0	8	0	0	0	0	0	71595	0.0033	21794344	0.9967	0	0
pAAV-sgRNA-tRNA-hsCDKL5-CMV-KASH-EGFP	A1036	22434033	245	43	0	241.14	3	0	0	0	0	3	0.0012	0	0	0	0	8	0	0	0	0	0	56197	0.0025	22377785	0.9975	0	0
pAAV-sgRNA-tRNA-hsCDKL5-CMV-KASH-EGFP	A1332	25673786	245	43	0	245.91	0	0	0	0	0	0	0.0027	0	0	0	0	7	0	0	0	0	0	62337	0.0024	25611399	0.9976	0	0
pAAV-sgRNA-tRNA-hsCDKL5-CMV-KASH-EGFP	A1733	26088185	245	5	0	184	0	0	0	0	0	0	0.0109	0	0	0	0	2	0	0	0	0	0	62864	0.0024	26025314	0.9976	0	0
pAAV-sgRNA-tRNA-hsCDKL5-CMV-KASH-EGFP	A1734	22470482	246	14	0	209.86	0	0	0	0	0	0	0.0003	0	0	0	0	3	0	0	0	0	0	44152	0.002	22426313	0.998	0	0
pAAV-sgRNA-tRNA-hsCDKL5-CMV-KASH-EGFP	B0417	24600402	245	11	0	202.91	2	0	2	0	0	0	0.0063	0.0027	3	0	0	12	0	0	0	0	0	72470	0.0029	24527909	0.9971	0	0
pAAV-sgRNA-tRNA-hsCDKL5-CMV-KASH-EGFP	B1330	29110255	245	55	0	240.98	8	0	3	0	0	5	0.0024	0	0	0.0002	1	9	0	0	0	0	0	63618	0.0022	29046573	0.9978	0	0
pAAV-sgRNA-tRNA-hsCDKL5-CMV-KASH-EGFP	B1728	27589894	245	126	0	245.62	1	0	0	0	0	1	0.0024	0.0002	3	0.0001	1	7	0	0	0	0	0	69531	0.0025	27520230	0.9975	0	0
pAAV-sgRNA-tRNA-hsCDKL5-CMV-KASH-EGFP	B2629	27159207	245	5	0	237.2	0	0	0	0	0	0	0.0025	0	0	0	0	17	0	0	0	0	0	80663	0.003	27078522	0.997	0	0
pAAV-sgRNA-tRNA-hsCDKL5-CMV-KASH-EGFP	C1331	29769567	245	31	0	213.48	0	0	0	0	0	0	0.0044	0	0	0	0	9	0	0	0	0	0	87511	0.0029	29682016	0.9971	0	0
pAAV-sgRNA-tRNA-hsCDKL5-CMV-KASH-EGFP	C1376	33238516	245	10	0	216.5	0	0	0	0	0	0	0.0028	0	0	0	0	13	0	0	0	0	0	104788	0.0032	33133705	0.9968	0	0
pAAV-sgRNA-tRNA-hsCDKL5-CMV-KASH-EGFP	C1735	28109184	245	18	0	216.72	0	0	0	0	0	0	0.0033	0	0	0	0	2	0	0	0	0	0	101556	0.0036	28007608	0.9964	0	0
pAAV-sgRNA-tRNA-msCdkl5-CMV-KASH-EGFP	JH10_S10_L003	33933676	224	12	0	51.08	6	0	6	0	0	0	0.0701	0	0	0	0	11	0	0	0	0	0	2082687	0.0614	31850966	0.9386	0	0
pAAV-sgRNA-tRNA-msCdkl5-CMV-KASH-EGFP	JH11_S11_L003	33081726	225	14	0	61.36	12	0	12	0	0	0	0.0489	0	0	0	0	11	0	0	0	0	0	1969391	0.0595	31112310	0.9405	0	0
pAAV-sgRNA-tRNA-msCdkl5-CMV-KASH-EGFP	JH12_S12_L003	28821041	228	15	0	47.13	6	0	6	0	0	0	0.0608	0	0	0	0	6	0	0	0	0	0	1488626	0.0517	27332394	0.9483	0	0
pAAV-sgRNA-tRNA-msCdkl5-CMV-KASH-EGFP	JH13_S13_L003	36453261	225	252810	0.0069	246.39	2539	0	763	94	3	1679	0.0031	0.0001	1.45	0.0002	4.62	6004	0.0002	0	0	0	0	2261259	0.062	33933188	0.9309	0	0
pAAV-sgRNA-tRNA-msCdkl5-CMV-KASH-EGFP	JH14_S14_L003	29874268	222	203869	0.0068	246.34	1898	0	400	49	4	1445	0.003	0.0001	1.83	0	2.36	2699	0.0001	0	0	0	0	2118581	0.0709	27549119	0.9222	0	0
pAAV-sgRNA-tRNA-msCdkl5-CMV-KASH-EGFP	JH15_S15_L003	38648754	224	329596	0.0085	246.28	3673	0	707	97	6	2863	0.0029	0.0001	1.92	0	1.79	4440	0.0001	0	0	0	0	2596190	0.0672	35718528	0.9242	0	0
pAAV-sgRNA-tRNA-msCdkl5-CMV-KASH-EGFP	JH1_S1_L003	30375708	221	43167	0.0014	246.34	288	0	71	10	0	207	0.0028	0.0001	1.71	0	2.97	584	0	0	0	0	0	2210912	0.0728	28121045	0.9258	0	0
pAAV-sgRNA-tRNA-msCdkl5-CMV-KASH-EGFP	JH2_S2_L003	37625504	225	71804	0.0019	246.48	602	0	211	18	1	372	0.0033	0.0001	1.57	0.0002	4.81	1452	0	1	0	0	0	2352339	0.0625	35199908	0.9355	0	0
pAAV-sgRNA-tRNA-msCdkl5-CMV-KASH-EGFP	JH3_S0_L001	30832797	229	35881	0.0012	246.81	229	0	65	9	0	155	0.003	0.0001	1.75	0	2.47	516	0	0	0	0	0	1515487	0.0492	29280913	0.9497	0	0
pAAV-sgRNA-tRNA-msCdkl5-CMV-KASH-EGFP	JH4_S4_L003	36914959	227	500960	0.0136	246.43	3809	0	777	100	6	2926	0.003	0.0001	1.83	0	1.93	7088	0.0002	0	0	0	0	2058643	0.0558	34348268	0.9305	0	0
pAAV-sgRNA-tRNA-msCdkl5-CMV-KASH-EGFP	JH5_S5_L003	29402590	226	316269	0.0108	246.53	2452	0	513	125	3	1811	0.003	0.0001	1.83	0	1.91	4319	0.0001	1	0	0	0	1771504	0.0602	27310497	0.9288	0	0
pAAV-sgRNA-tRNA-msCdkl5-CMV-KASH-EGFP	JH6_S6_L003	51480542	232	531507	0.0103	246.71	4032	0	867	109	9	3047	0.0031	0.0001	1.85	0	1.94	7668	0.0001	0	0	0	0	2194125	0.0426	48747242	0.9469	0	0
pAAV-sgRNA-tRNA-msCdkl5-CMV-KASH-EGFP	JH7_S7_L003	37787065	223	24	0	57.29	26	0	26	0	0	0	0.0531	0	0	0	0	10	0	0	0	0	0	2469817	0.0654	35317214	0.9346	0	0
pAAV-sgRNA-tRNA-msCdkl5-CMV-KASH-EGFP	JH8_S8_L003	37269773	225	24	0	56.12	14	0	14	0	0	0	0.0527	0	0	0	0	18	0	0	0	0	0	2278962	0.0611	34990769	0.9389	0	0
pAAV-sgRNA-tRNA-msCdkl5-CMV-KASH-EGFP	JH9_S0_L001	30577934	224	18	0	49.61	15	0	14	0	0	1	0.0683	0	0	0	0	14	0	0	0	0	0	1952084	0.0638	28625818	0.9362	0	0
pAAV-sgRNA-tRNA-msCdkl5-CMV-KASH-EGFP	A0416	21866080	245	134	0	231.01	4	0	4	0	0	0	0.002	0.0006	3	0	0	8	0	0	0	0	0	67739	0.0031	21798199	0.9969	0	0
pAAV-sgRNA-tRNA-msCdkl5-CMV-KASH-EGFP	A1036	22434033	245	43	0	241.14	3	0	0	0	0	3	0.0012	0	0	0	0	9	0	0	0	0	0	53036	0.0024	22380945	0.9976	0	0
pAAV-sgRNA-tRNA-msCdkl5-CMV-KASH-EGFP	A1332	25673786	245	45	0	245.11	0	0	0	0	0	0	0.0026	0	0	0	0	6	0	0	0	0	0	58427	0.0023	25615308	0.9977	0	0
pAAV-sgRNA-tRNA-msCdkl5-CMV-KASH-EGFP	A1733	26088185	245	5	0	184	0	0	0	0	0	0	0.0109	0	0	0	0	2	0	0	0	0	0	59130	0.0023	26029048	0.9977	0	0
pAAV-sgRNA-tRNA-msCdkl5-CMV-KASH-EGFP	A1734	22470482	246	14	0	209.86	0	0	0	0	0	0	0.0003	0	0	0	0	3	0	0	0	0	0	41870	0.0019	22428595	0.9981	0	0
pAAV-sgRNA-tRNA-msCdkl5-CMV-KASH-EGFP	B0417	24600402	245	11	0	202.91	2	0	2	0	0	0	0.0063	0.0027	3	0	0	12	0	0	0	0	0	68450	0.0028	24531929	0.9972	0	0
pAAV-sgRNA-tRNA-msCdkl5-CMV-KASH-EGFP	B1330	29110255	245	55	0	240.98	8	0	3	0	0	5	0.0024	0	0	0.0002	1	9	0	0	0	0	0	59533	0.002	29050658	0.998	0	0
pAAV-sgRNA-tRNA-msCdkl5-CMV-KASH-EGFP	B1728	27589894	245	128	0	245.64	1	0	0	0	0	1	0.0024	0.0002	3	0.0001	1	7	0	0	0	0	0	65208	0.0024	27524551	0.9976	0	0
pAAV-sgRNA-tRNA-msCdkl5-CMV-KASH-EGFP	B2629	27159207	245	5	0	237.2	0	0	0	0	0	0	0.0025	0	0	0	0	17	0	0	0	0	0	76047	0.0028	27083138	0.9972	0	0
pAAV-sgRNA-tRNA-msCdkl5-CMV-KASH-EGFP	C1331	29769567	245	31	0	213.71	1	0	1	0	0	0	0.0047	0	0	0	0	9	0	0	0	0	0	82753	0.0028	29686774	0.9972	0	0
pAAV-sgRNA-tRNA-msCdkl5-CMV-KASH-EGFP	C1376	33238516	245	10	0	216.5	0	0	0	0	0	0	0.0028	0	0	0	0	13	0	0	0	0	0	98917	0.003	33139576	0.997	0	0
pAAV-sgRNA-tRNA-msCdkl5-CMV-KASH-EGFP	C1735	28109184	245	18	0	216.72	0	0	0	0	0	0	0.0033	0	0	0	0	2	0	0	0	0	0	96595	0.0034	28012569	0.9966	0	0
pAAV-VPR-dCN	JH10_S10_L003	33933676	224	5	0	46.4	10	0	10	0	0	0	0.0517	0	0	0	0	0	0	0	0	0	0	3108181	0.0916	30825490	0.9084	0	0
pAAV-VPR-dCN	JH11_S11_L003	33081726	225	13	0	46.85	32	0	32	0	0	0	0.0608	0	0	0	0	0	0	0	0	0	0	2927207	0.0885	30154506	0.9115	0	0
pAAV-VPR-dCN	JH12_S12_L003	28821041	228	5	0	42.8	12	0	12	0	0	0	0.0467	0	0	0	0	0	0	0	0	0	0	2240443	0.0777	26580593	0.9223	0	0
pAAV-VPR-dCN	JH13_S13_L003	36453261	225	144	0	71.66	74	0	58	0	0	16	0.015	0	0	0	0	27	0	0	0	0	0	3296930	0.0904	33156160	0.9096	0	0
pAAV-VPR-dCN	JH14_S14_L003	29874268	222	68	0	59.82	32	0	32	0	0	0	0.0076	0	0	0	0	8	0	0	0	0	0	3047534	0.102	26826658	0.898	0	0
pAAV-VPR-dCN	JH15_S15_L003	38648754	224	83	0	52.93	43	0	43	0	0	0	0.0089	0	0	0	0	6	0	0	0	0	0	3693463	0.0956	34955202	0.9044	0	0
pAAV-VPR-dCN	JH1_S1_L003	30375708	221	639	0	237.26	52	0	28	0	0	24	0.0027	0.0035	11.17	0.0003	5.71	15	0	0	0	0	0	3241721	0.1067	27133333	0.8933	0	0
pAAV-VPR-dCN	JH2_S2_L003	37625504	225	1923	0.0001	239.04	104	0	31	1	1	71	0.0035	0.0049	10.56	0.0006	8.48	28	0	0	0	0	0	3429334	0.0911	34194219	0.9088	0	0
pAAV-VPR-dCN	JH3_S0_L001	30832797	229	515	0	238.24	39	0	17	0	0	22	0.0031	0.0028	10.52	0.0003	5.71	8	0	0	0	0	0	2251387	0.073	28580887	0.927	0	0
pAAV-VPR-dCN	JH4_S4_L003	36914959	227	98	0	60.34	3	0	2	0	0	1	0.0051	0	0	0	0	4	0	0	0	0	0	2933890	0.0795	33980967	0.9205	0	0
pAAV-VPR-dCN	JH5_S5_L003	29402590	226	89	0	54.18	18	0	18	0	0	0	0.0033	0	0	0	0	4	0	0	0	0	0	2541974	0.0865	26860523	0.9135	0	0
pAAV-VPR-dCN	JH6_S6_L003	51480542	232	88	0	57.82	22	0	20	0	0	2	0.0079	0	0	0	0	7	0	0	0	0	0	3177079	0.0617	48303368	0.9383	0	0
pAAV-VPR-dCN	JH7_S7_L003	37787065	223	12	0	43.33	22	0	22	0	0	0	0.05	0	0	0	0	0	0	0	0	0	0	3658200	0.0968	34128853	0.9032	0	0
pAAV-VPR-dCN	JH8_S8_L003	37269773	225	6	0	42.67	12	0	12	0	0	0	0.0547	0	0	0	0	0	0	0	0	0	0	3365750	0.0903	33904017	0.9097	0	0
pAAV-VPR-dCN	JH9_S0_L001	30577934	224	18	0	44.22	39	0	39	0	0	0	0.0477	0	0	0	0	0	0	0	0	0	0	2883310	0.0943	27694606	0.9057	0	0
pAAV-VPR-dCN	A0416	21866080	245	34	0	219.53	3	0	3	0	0	0	0.0047	0.008	12	0	0	0	0	0	0	0	0	140415	0.0064	21725631	0.9936	0	0
pAAV-VPR-dCN	A1036	22434033	245	20	0	244.65	8	0	0	0	0	8	0.0025	0.0025	12	0.0006	1	0	0	0	0	0	0	115821	0.0052	22318192	0.9948	0	0
pAAV-VPR-dCN	A1332	25673786	245	10	0	239.4	0	0	0	0	0	0	0.0013	0	0	0	0	0	0	0	0	0	0	128843	0.005	25544933	0.995	0	0
pAAV-VPR-dCN	A1733	26088185	245	0	0	0	0	0	0	0	0	0	NA	0	0	0	0	0	0	0	0	0	0	130099	0.005	25958086	0.995	0	0
pAAV-VPR-dCN	A1734	22470482	246	1	0	46	2	0	2	0	0	0	0.0435	0	0	0	0	0	0	0	0	0	0	92054	0.0041	22378427	0.9959	0	0
pAAV-VPR-dCN	B0417	24600402	245	0	0	0	0	0	0	0	0	0	NA	0	0	0	0	0	0	0	0	0	0	144968	0.0059	24455434	0.9941	0	0
pAAV-VPR-dCN	B1330	29110255	245	0	0	0	0	0	0	0	0	0	NA	0	0	0	0	0	0	0	0	0	0	130104	0.0045	28980151	0.9955	0	0
pAAV-VPR-dCN	B1728	0	0	0	0	0	0	0	0	0	0	0	NA	0	0	0	0	0	0	0	0	0	0	0	0	0	0	0	0
pAAV-VPR-dCN	B2629	27159207	245	0	0	0	0	0	0	0	0	0	NA	0	0	0	0	0	0	0	0	0	0	158914	0.0059	27000293	0.9941	0	0
pAAV-VPR-dCN	C1331	29769567	245	1	0	48	4	0	4	0	0	0	0.125	0	0	0	0	0	0	0	0	0	0	170711	0.0057	29598855	0.9943	0	0
pAAV-VPR-dCN	C1376	33238516	245	0	0	0	0	0	0	0	0	0	NA	0	0	0	0	0	0	0	0	0	0	207468	0.0062	33031048	0.9938	0	0
pAAV-VPR-dCN	C1735	28109184	245	0	0	0	0	0	0	0	0	0	NA	0	0	0	0	0	0	0	0	0	0	194370	0.0069	27914814	0.9931	0	0
